# Supplementary material
Source: publisher figshare collection journal article supplement (https://tandf.figshare.com/ndownloader/files/21744846)

**Table S1** Clinical characteristics between patients with and without admission ionized calcium measurement

|  | No admission ionized calcium measurement | Admission Ionized calcium measurement | p-value |
| --- | --- | --- | --- |
| Age (year) | 61±18 | 62±17 | <0.001 |
| Male | 53% | 55% | <0.001 |
| Caucasian | 93% | 92% | <0.001 |
| GFR (ml/min/1.73m2) | 78±28 | 74±31 | <0.001 |
| Charlson score | 1.8±2.3 | 2.1±2.5 | <0.001 |
| Principal diagnosis   - Cardiovascular - Hematology/Oncology - Infectious disease - Endocrine/metabolic - Respiratory - Gastrointestinal - Genitourinary - Injury and poisoning - Other | 21%  15%  3%  3%  4%  9%  4%  15%  25% | 27%  19%  4%  3%  5%  10%  3%  14%  15% | <0.001 |

Figure S1 study flow chart


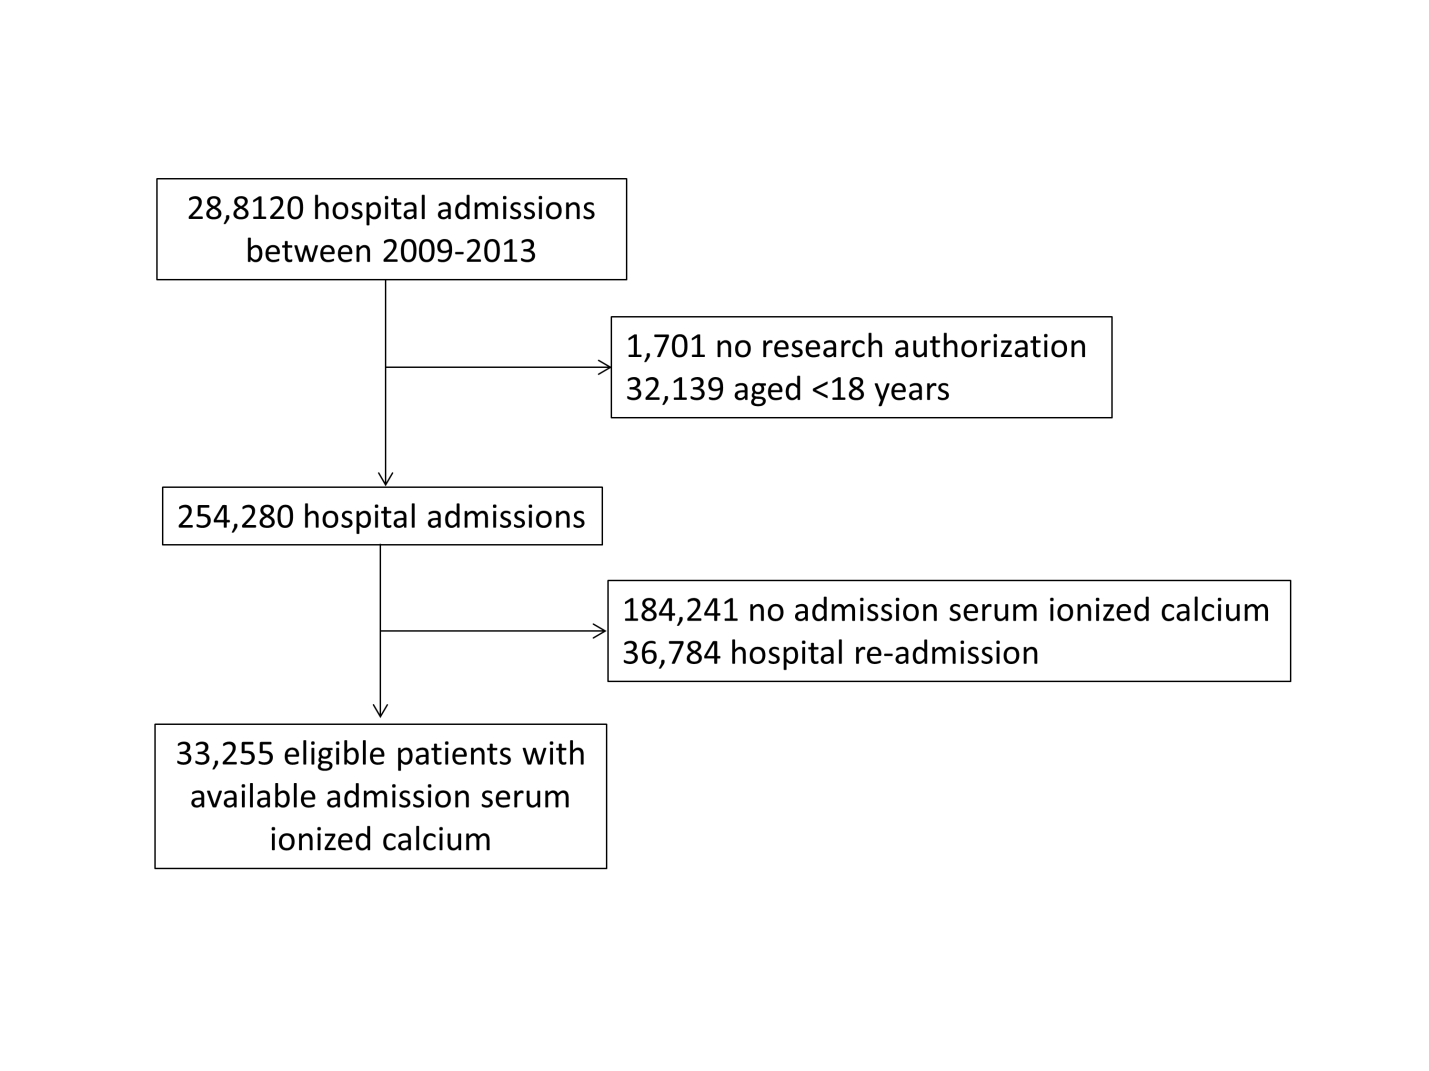

Supplement: Supplementary file 1 [file 21744846]
